# Supplementary material
Source: publisher site journal article supplement (https://www.spandidos-publications.com/978/downloadSupplementary)

Figure S1. Correlation analysis of tenuifolin with known compounds. Each row represents a different compound and its corresponding target, belonging to a different signalling pathway. Each column indicates a different tenuifolin concentration. Rectangles in different colours represent the correlation coefficient of a pair of drugs: red, high correlation; blue, low correlation.

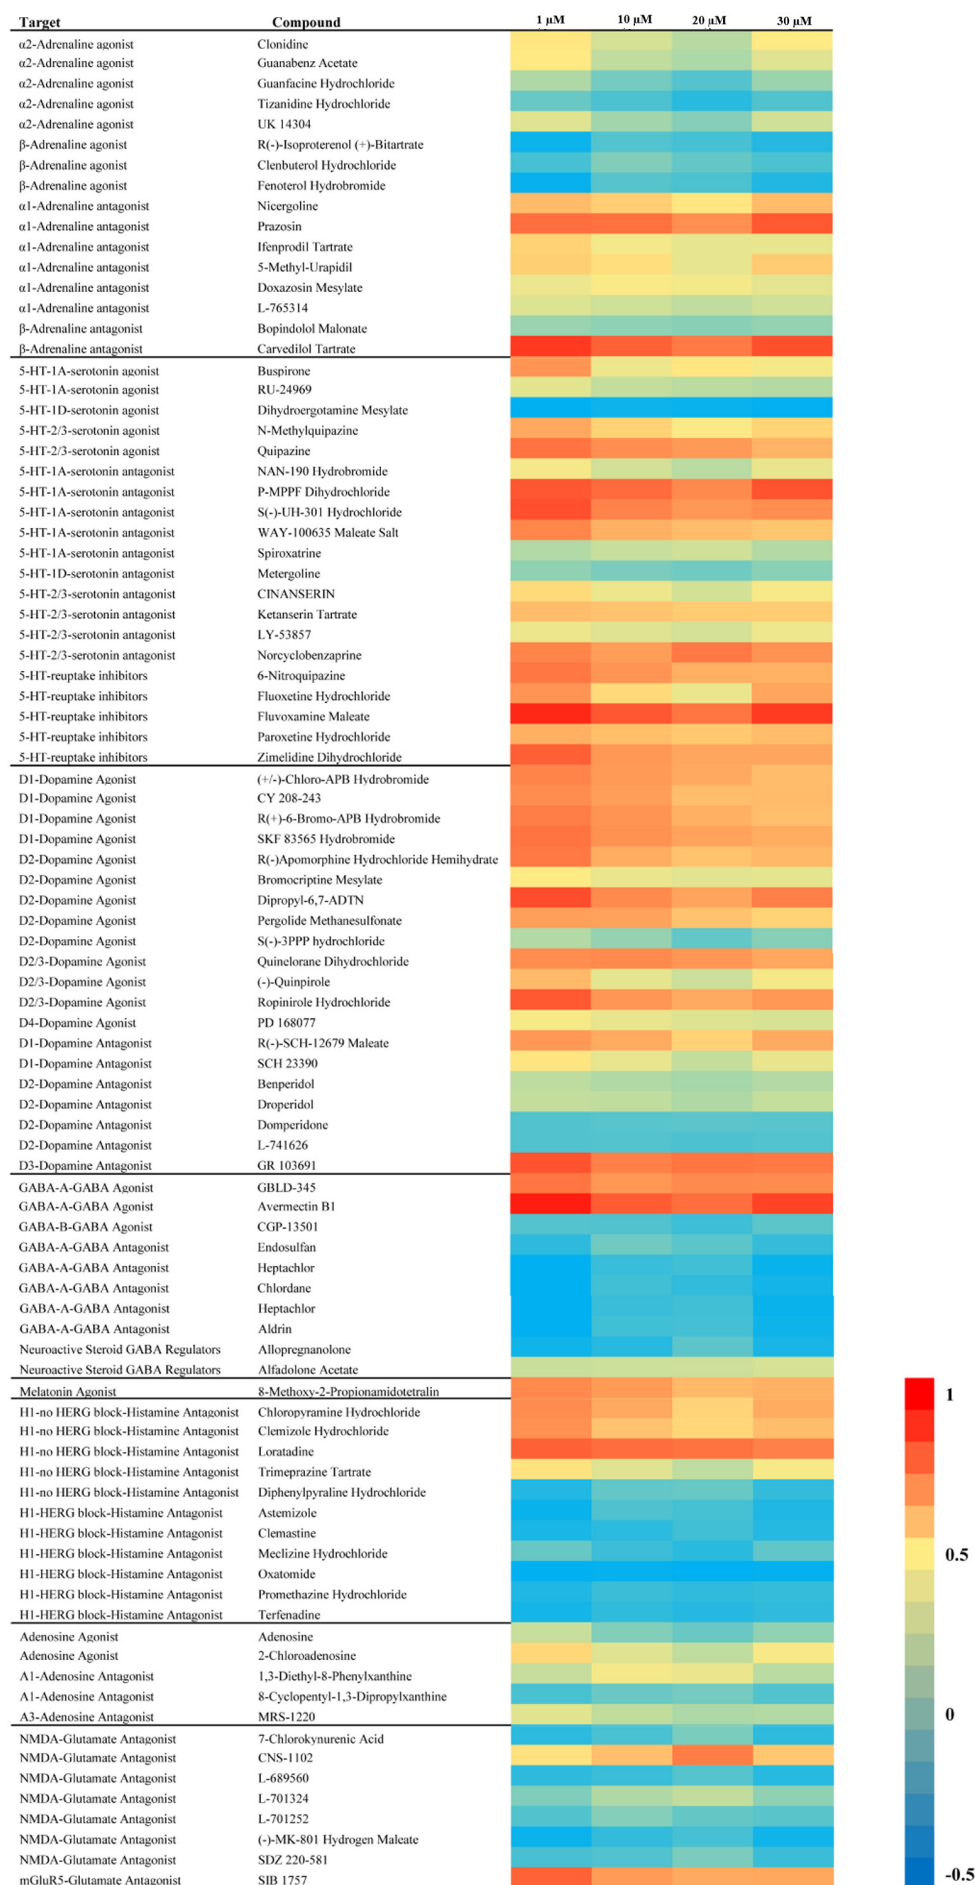

Supplement: Supplementary file 1 [file downloadSupplementary]
